# Supplementary material
Source: Springer Nature journal article supplement (https://www.springermedizin.de/resource/supplementary/13053_2012_446_MOESM2_ESM.pdf/9673860)

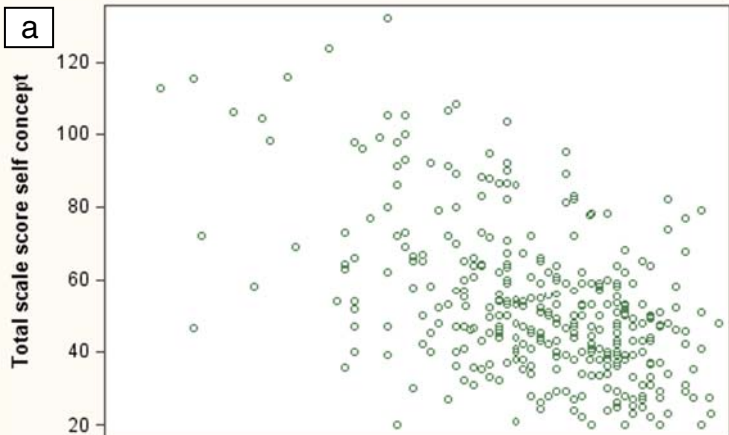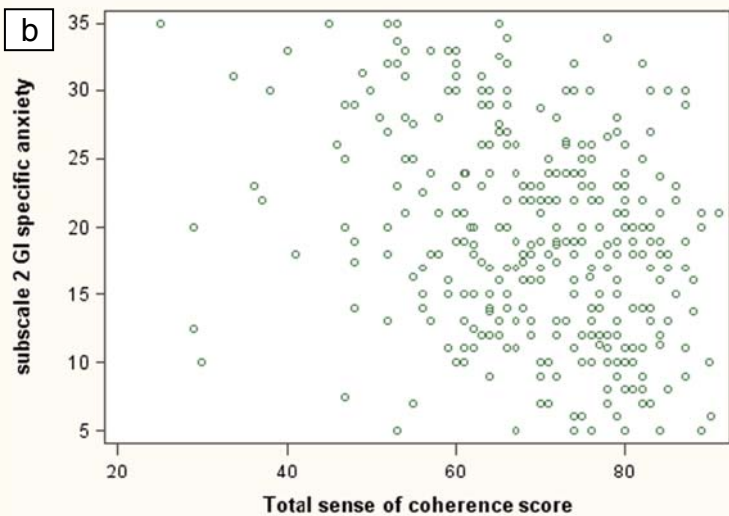

Supplement: MOESM2 [file 9673860]
